# Supplementary material for: Dielectric Spectroscopy of Hybrid Magnetoactive Elastomers
Source: MDPI journal article supplement (doi:10.3390/polym13122002), 2021-06-18
Supplement: s1 [file s1]

# Supplementary Materials

## Dielectric Spectroscopy of Hybrid Magnetoactive Elastomers

Vitaliy G. Shevchenko <sup>1</sup>, Gennady V. Stepanov <sup>2,3</sup> and Elena Yu. Kramarenko <sup>3,4,\*</sup>

<sup>1</sup> Enikilopov Institute of Synthetic Polymeric Materials of Russian Academy of Sciences (ISPM RAS), 117393 Moscow, Russia; vgshev@gmail.com

<sup>2</sup> State Scientific Center of the Russian Federation, Institute of Chemistry and Technology of Organoelement Compounds, 111123 Moscow, Russia; gstepanov@mail.ru

<sup>3</sup> Faculty of Physics, Lomonosov Moscow State University, 119991 Moscow, Russia; kram@polly.phys.msu.ru

<sup>4</sup> A. N. Nesmeyanov Institute of Organoelement Compounds RAS, 119991 Moscow, Russia

\* Correspondence: kram@polly.phys.msu.ru; Tel.: +7-495-939-4013

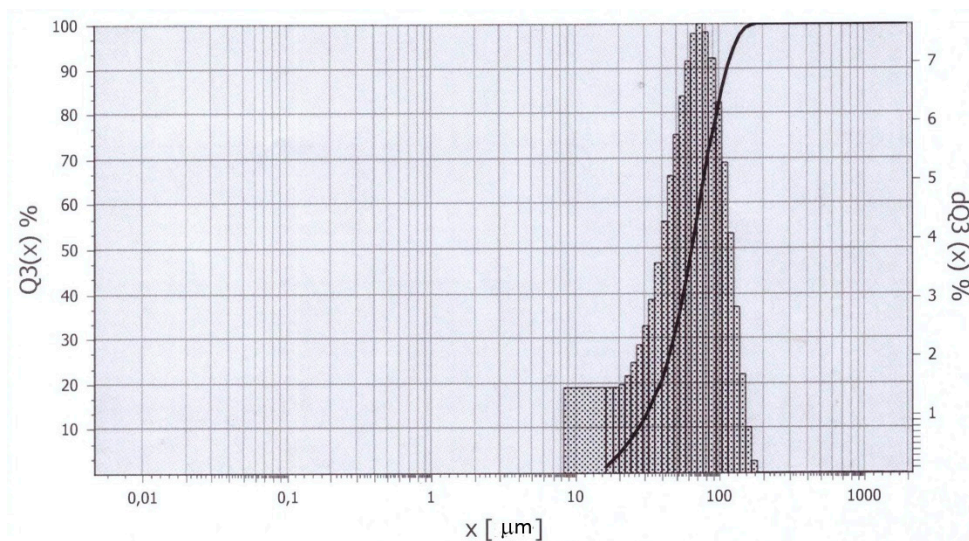

**Figure S1.** Size distribution of NdFeB particles (Analysette 22, Fritsch). Before measurements, the particles passed through a sieve with a meshsize of 100  $\mu\text{m}$ . The shift in the distribution to larger sizes is caused by the irregular shape of the particles and their improper handling of the device.

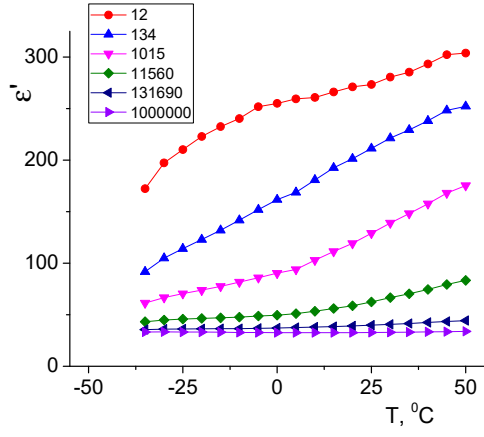

a

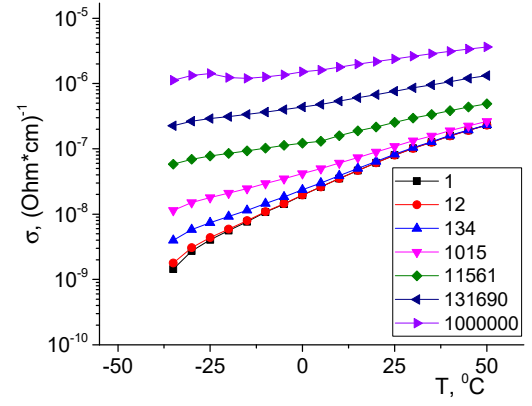

b

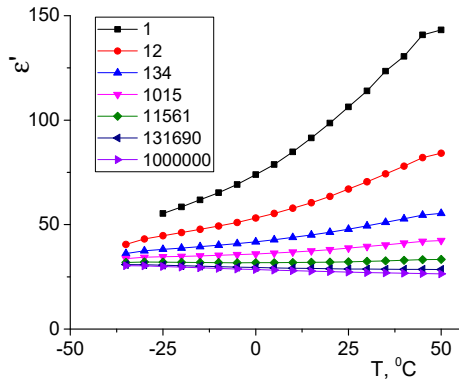

c

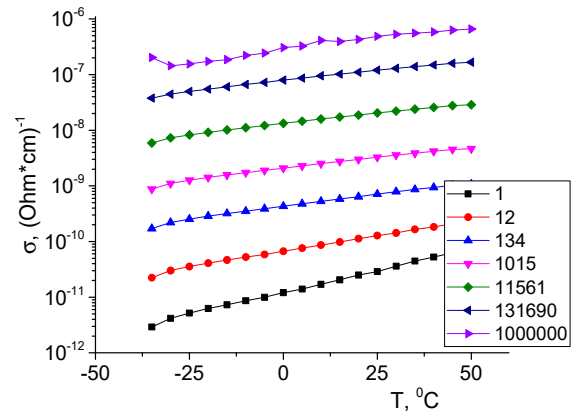

d

**Figure S2.** Temperature dependence of the dielectric permittivity (a,c) and conductivity (b,d) of the initial MAE-Fe (c,d) and magnetized MAE-Fe-m (a,b) samples at various frequencies as indicated in Hz.

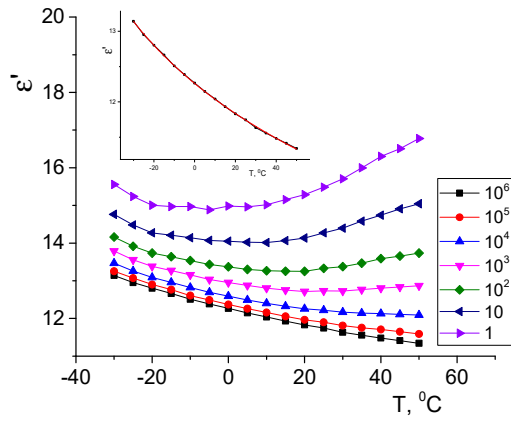

a

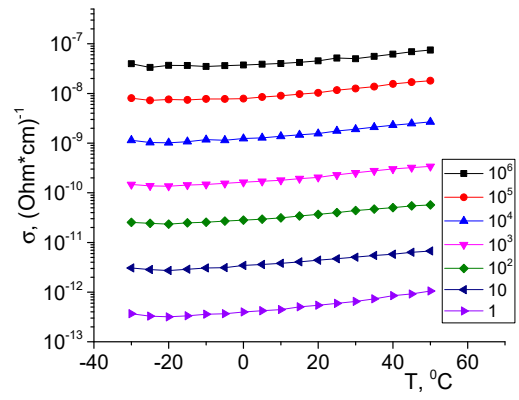

b

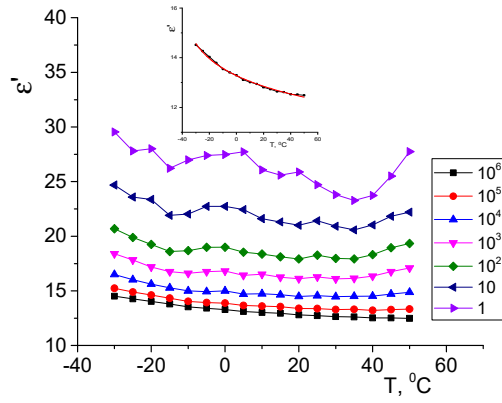

c

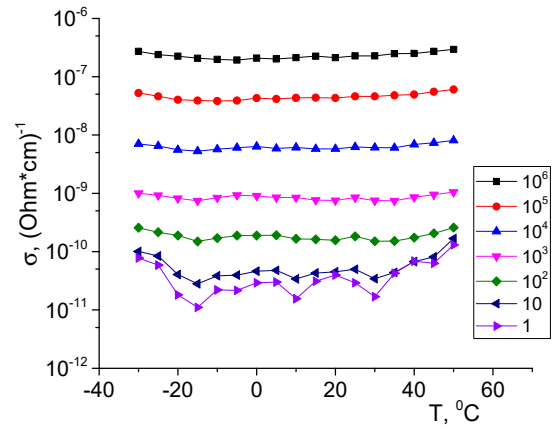

d

**Figure S3.** Temperature dependence of the dielectric permittivity (a,c) and conductivity (b,d) of the initial MAE-O (c,d) and magnetized MAE-O-m (a,b) samples at various frequencies as indicated in Hz.
